1 **Deficiency of the paternally inherited gene *Mage12* alters the development of separation-**  
2 **induced vocalization in mice**

3

4 **Authors:**

5 **Gabriela M. Bosque Ortiz**<sup>1,2</sup>, **Gustavo M. Santana**<sup>1,2</sup>, **Marcelo O. Dietrich**<sup>1,2,3,4\*</sup>

6

7 <sup>1</sup> Laboratory of Physiology of Behavior, Department of Comparative Medicine, Yale School of  
8 Medicine, New Haven, CT, USA.

9 <sup>2</sup> Interdepartmental Neuroscience Program, Biological and Biomedical Sciences Program,  
10 Graduate School in Arts and Sciences, Yale University, New Haven, CT.

11 <sup>3</sup> Program in Integrative Cell Signaling and Neurobiology of Metabolism, Department of  
12 Comparative Medicine, Yale School of Medicine, New Haven, CT, USA.

13 <sup>4</sup> Department of Neuroscience, Yale School of Medicine, New Haven, CT, USA.

14

15 \* Correspondence to: [marcelo.dietrich@yale.edu](mailto:marcelo.dietrich@yale.edu)

16

17 **Abstract**

18 Offspring behavior results from the combined expression of maternal and paternal genes.  
19 Genomic imprinting, however, silences some genes in a parent-of-origin specific manner, a  
20 process that, among all animals, occurs only in mammals. How genomic imprinting affects the  
21 behavior of mammalian offspring remains poorly understood. Here we studied the effects of the  
22 loss of the paternally inherited gene *Mage12* on the emission of separation-induced ultrasonic  
23 vocalization (USV) by mouse pups. Using quantitative analysis of more than one hundred  
24 thousand USVs, we characterized the rate of vocalizations as well as their spectral features  
25 from postnatal days 6 to 12 (P6-P12), a critical phase during mouse development when pups  
26 fully depend on the mother for survival. Our analyses show that *Mage12* deficient offspring emit  
27 separation-induced vocalizations at lower rates and with altered spectral features. Using  
28 methods for a holistic analysis of the entire vocal repertoire of pups, we found that *Mage12*  
29 deficient mice at postnatal day 8 (P8) emit USVs that resemble the vocal repertoire of wildtype  
30 mice at older ages (P10-12). These results suggest that the deficiency of this paternally  
31 inherited gene impairs the expression of separation-induced vocalization in pups, a behavior  
32 that supports the pups' growth and development.

33

34 **Keywords**

35 Genomic imprinting; offspring-parent conflict; Prader Willi Syndrome; Autism spectrum  
36 disorders; behavior development.

37

38

## 39 Introduction

40

41 For the normal development of mammals, offspring need copies from both maternal and paternal  
42 genomes. Some genes, however, are expressed in a parent-of-origin specific manner. In other  
43 words, some genes are always expressed when inherited from the mother and some genes are  
44 always expressed when inherited from the father<sup>1-3</sup>. The process that regulates the expression  
45 of genes in a parent-of-origin specific manner is called genomic imprinting<sup>2,3</sup>.

46

47 Genomic imprinting depends on epigenetic modifications of the genome. These modifications do  
48 not alter the sequence of the DNA but the chemical structure of the DNA, thereby leading to  
49 altered gene expression<sup>4</sup>. An imprinted gene can be silenced in the maternal genome and,  
50 therefore, only the paternal allele will be expressed in the offspring. Consider, for example, a  
51 series of imprinted genes in human chromosome 15, which illustrates the importance of paternally  
52 inherited genes for normal mammalian development<sup>5-9</sup>. The deletion of the paternally inherited  
53 genes in chromosome 15 leads to neurodevelopmental disorders, such as Prader-Willi syndrome  
54 (PWS). PWS presents with hypotonia and poor feeding early in life, followed by hyperphagia,  
55 alteration in social behavior, and cognitive deficits. It should be noted, however, that because  
56 PWS involves several genes, it masks the relative contribution of single imprinted genes on the  
57 phenotype of the offspring.

58

59 Among the PWS-related genes, *MAGEL2* is a candidate gene for some of the clinical features of  
60 PWS. Humans with loss-of-function mutations in *MAGEL2* present clinical aspects of PWS and  
61 autism spectrum disorders<sup>10-12</sup>, suggesting that this single paternally inherited gene supports at  
62 least some of the developmental alterations found in PWS. In agreement with the clinical features  
63 of *MAGEL2* deficiency in humans, *MageI2* deficient mice show impairments in growth and adult  
64 social behaviors which are, however, of small-effect size<sup>10,13,14</sup>.

65

66 In this study, we investigated whether the loss of paternally inherited *Mage12* in mice alters  
67 behaviors that are ecologically relevant for the development of the offspring. We chose to study  
68 the vocal behavior of mouse pups when separated from their dams <sup>15-23</sup>, as separation-induced  
69 vocalizations signal the needs of the pups to the dams <sup>19,24-29</sup>. In contrast to human babies,  
70 mouse pups vocalize in the ultrasonic frequency range (45 - 120 kHz) <sup>20,21,23,30</sup>, which humans  
71 cannot hear. In order to survey the vocal behavior of mice, we recorded the emission of  
72 ultrasonic vocalizations (USVs) when pups were separated from the home nest. We performed  
73 these studies at postnatal days 6, 8, 10, and 12, since it is during this phase of mouse  
74 development that the peak expression of separation-induced vocalizations typically occurs  
75 <sup>15,31,32</sup>. We then used VocalMat <sup>33</sup>, a software developed by our group, to perform quantitative  
76 analysis of mouse vocal behavior. Our analysis shows that the deficiency of *Mage12* in mice  
77 impairs the expression of separation-induced vocalizations, a behavior that supports pups'  
78 growth and development.

79

## 80 Results

81

### 82 Early waning of vocal behavior in *MageI2*<sup>m+/p-</sup> deficient pups

83 To investigate the effects of paternally inherited *MageI2* on the vocal behavior of infant mice, we  
84 crossed heterozygote males for *MageI2* deficiency with wildtype females. From this cross, we  
85 generated *MageI2* deficient offspring (*MageI2*<sup>m+/p-</sup>) that carry the null allele from the father (p-) and the imprinted allele from the mother (m+). This cross also generates wildtype littermates  
86 (*MageI2*<sup>m+/p+</sup>), used as experimental controls. As previously reported<sup>10</sup>, *MageI2*<sup>m+/p-</sup> pups display  
87 lower body weight compared to controls (genotype:  $F_{1, 182} = 19.91$ ,  $P < 10^{-4}$ ; age:  $F_{3, 182} = 70.09$ ,  
88  $P < 10^{-9}$ ; genotype x age:  $F_{3, 182} = 0.02$ ,  $P = 0.996$ ; two-way ANOVA).

90

91 We recorded the emission of USVs during 20 minutes of separation from the home nest at  
92 different postnatal ages (P6, P8, P10 and P12; **Figure 1A**). First, we analyzed the total number  
93 of USVs emitted during the period of separation using two-way ANOVA. We found a significant  
94 effect of genotype, age, and interaction between genotype and age (genotype:  $F_{1, 181} = 20.61$ ,  $P$   
95  $< 10^{-4}$ ; age:  $F_{3, 181} = 11.80$ ,  $P < 10^{-6}$ ; genotype x age:  $F_{3, 181} = 3.90$ ,  $P = 0.009$ ; **Figure 1B**). Post-  
96 hoc analysis (Sidak's multiple comparisons test; **Figure 1B**) shows that the total number of  
97 USVs is similar among groups at P6 (control:  $991 \pm 139$  USVs,  $n = 16$ ; *MageI2*<sup>m+/p-</sup>:  $787 \pm 130$   
98 USVs,  $n = 20$ ;  $P = 0.75$ ), P10 (control:  $503 \pm 45$  USVs,  $n = 23$ ; *MageI2*<sup>m+/p-</sup>:  $466 \pm 70$  USVs,  $n =$   
99  $20$ ;  $P = 0.98$ ), and P12 (control:  $594 \pm 71$  USVs,  $n = 30$ ; *MageI2*<sup>m+/p-</sup>:  $345 \pm 46$  USVs,  $n = 28$ ;  $P$   
100  $= 0.06$ ). Compared to controls, however, *MageI2*<sup>m+/p-</sup> pups show a  $\approx 53\%$  reduction in the  
101 emission of USVs at P8 (control:  $1045 \pm 100$  USVs,  $n = 24$ ; *MageI2*<sup>m+/p-</sup>:  $495 \pm 65$  USVs,  $n = 28$ ;  
102  $P < 10^{-4}$ ). It is worth noting that P8 *MageI2*<sup>m+/p-</sup> pups emit a similar number of USVs compared to  
103 P10 and P12 control pups, suggesting an early decline in vocal behavior. We also performed  
104 these analyses in females and males separately and found similar effects of genotype and age  
105 (**Figure 1C-D** and **Supplementary Table 1**). These results show age-specific reductions in the

106 emission of USVs in *MageI2*<sup>m+/p-</sup> mice, suggesting a non-sex specific effect for paternally  
107 inherited *MageI2* on the vocal behavior of the offspring.

108

109 The emission of USVs occurs when the breathing musculature contracts, expelling air from the  
110 lungs and propelling it through the larynx<sup>29,34</sup>. Since previous reports found that *MageI2*<sup>m+/p-</sup>  
111 mice display hypotonia<sup>35</sup>, we considered the hypothesis that the low rate of USV emission in  
112 *MageI2* deficient pups is due to a lower capacity to expel air from the lungs. To rule out this  
113 hypothesis, we measured the intensity (or volume, in decibels) of the USVs. Since the intensity  
114 of the USVs relates to the pressure by which the air is expelled through the larynx<sup>29,34</sup>, a lower  
115 intensity is expected in cases of hypotonia. This analysis shows that the intensity of the emitted  
116 USVs between *MageI2*<sup>m+/p-</sup> mice and controls is similar in all ages tested (genotype:  $F_{1,175} =$   
117  $0.82$ ,  $P = 0.63$ ; age:  $F_{3,175} = 2.64$ ,  $P = 0.05$ ; genotype x age:  $F_{3,175} = 0.68$ ,  $P = 0.56$ ; two-way  
118 ANOVA; **Figure 1E**). Thus, hypotonia does not seem to be a factor of primary significance for  
119 the lower rate of USV emission in *MageI2*<sup>m+/p-</sup> mice<sup>34</sup>.

120

### 121 ***MageI2*<sup>m+/p-</sup> mice emit vocalizations with distinct spectral features**

122 In addition to the rate of separation-induced vocalizations, the spectral features of the USVs  
123 also correlate with altered maternal care<sup>36</sup>. To test the extent to which *MageI2* deficiency affects  
124 the spectral features of USVs across ages, we used two-way ANOVA to analyze the frequency  
125 characteristics (pitch) and duration (**Figure 2A**) of USVs<sup>33</sup>. We found significant effects of  
126 genotype and age for maximal frequency (genotype:  $F_{1,182} = 20.38$ ,  $P < 10^{-4}$ ; age:  $F_{3,182} = 2.79$ ,  
127  $P = 0.04$ ; genotype x age:  $F_{3,182} = 6.45$ ,  $P = 0.0004$ ; **Figure 2B**) and bandwidth (genotype:  $F_{1,182}$   
128  $= 9.79$   $P = 0.002$ ; age:  $F_{3,182} = 6.94$ ,  $P = 0.0002$ ; genotype x age:  $F_{3,182} = 5.88$ ,  $P = 0.0007$ ;  
129 **Figure 2E**). When comparing *MageI2*<sup>m+/p-</sup> to control mice, post-hoc analysis (Sidak's multiple  
130 comparisons test) shows that at P8—but not at P6, P10, or P12—there is a 3% reduction in  
131 maximal frequency (control:  $88.4 \pm 1.5$  kHz,  $n = 24$ ; *MageI2*<sup>m+/p-</sup>:  $85.6 \pm 1.1$  kHz,  $n = 28$ ;  $P < 10^{-$

132 <sup>4</sup>; **Figure 2B**) and a 40% reduction in bandwidth (control:  $17.3 \pm 1.2$  kHz,  $n = 24$ ; *Mage12*<sup>m+/p-</sup>:  
133  $10.4 \pm 0.7$  kHz,  $n = 28$ ;  $P < 10^{-5}$ ; **Figure 2E**). Moreover, we found a significant effect of genotype  
134 for mean frequency (genotype:  $F_{1, 181} = 4.86$ ,  $P = 0.02$ ; age:  $F_{3, 181} = 0.24$ ,  $P = 0.87$ ; genotype x  
135 age:  $F_{3, 181} = 0.41$ ,  $P = 0.74$ ; **Figure 2D**), but not for minimal frequency (genotype:  $F_{1, 182} = 0.54$ ,  
136  $P = 0.46$ ; age:  $F_{3, 182} = 1.97$ ,  $P = 0.12$ ; genotype x age:  $F_{3, 182} = 0.47$ ,  $P = 0.83$  **Figure 2C**) or  
137 duration (genotype:  $F_{1, 175} = 3.54$ ,  $P = 0.06$ ; age:  $F_{3, 175} = 5.78$ ,  $P = 0.0009$ ; genotype x age:  $F_{3,$   
138  $175 = 1.98$ ,  $P = 0.11$ ; **Figure 2F**). In addition to the main frequency component, USVs can  
139 contain harmonics (**Figure 2G**). We calculated the percentage of USVs with harmonics and  
140 found a significantly lower number in *Mage12*<sup>m+/p-</sup> mice compared to controls at P8 (control:  $9.1 \pm$   
141  $1.6$  % ,  $n = 24$ ; *Mage12*<sup>m+/p-</sup>:  $3.4 \pm 0.8$  % ,  $n = 28$ ;  $U = 146$ ,  $P_{2\text{-tailed}} = 0.0003$ , Mann-Whitney test;  
142 **Figure 2H**) but not at P6 (control:  $2.0 \pm 0.2$  % ,  $n = 16$ ; *Mage12*<sup>m+/p-</sup>:  $2.1 \pm 0.2$  % ,  $n = 20$ ;  $U =$   
143  $138$ ,  $P_{2\text{-tailed}} = 0.49$ , Mann-Whitney test; **Figure 2H**), P10 (control:  $5.7 \pm 0.8$  % ,  $n = 23$ ;  
144 *Mage12*<sup>m+/p-</sup>:  $6.1 \pm 1.2$  % ,  $n = 20$ ;  $U = 240$ ,  $P_{2\text{-tailed}} = 0.98$ , Mann-Whitney test; **Figure 2H**), or P12  
145 (control:  $3.6 \pm 0.6$  % ,  $n = 30$ ; *Mage12*<sup>m+/p-</sup>:  $4.9 \pm 0.1$  % ,  $n = 28$ ;  $U = 408.5$ ,  $P_{2\text{-tailed}} = 0.86$ , Mann-  
146 Whitney test; **Figure 2H**). In sum, these results suggest that the loss of paternally inherited  
147 *Mage12* in mice causes discrete changes in the features of separation-induced vocalizations that  
148 are most evident at postnatal day eight.

149

#### 150 **Discrete changes in the use of syllable types by *Mage12*<sup>m+/p-</sup> mice**

151 Mouse pups emit USVs of distinct classes—i.e., syllable types. Thus, the emission of different  
152 syllable types could explain the discrete changes in the spectro-temporal features of USVs in  
153 *Mage12*<sup>m+/p-</sup> (**Figure 3A**)<sup>33,37</sup>. We used machine learning to automatically categorize each USV  
154 into one of eleven syllable types based on the morphology of the main component of the  
155 vocalization. The output of the method was the probability for each USV to be of a certain  
156 syllable type. The highest probability ( $P_1$ ) defined the syllable type for a given USV (**Figure 3B**).  
157 Using this approach, we did not find any significant differences in the distribution of syllable

158 types emitted by control and *Mage12*<sup>m+/p-</sup> mice at P6, P10, and P12 (**Figure 3C, 3E, 3F**). At P8,  
159 however, *Mage12*<sup>m+/p-</sup> pups emit 54% less USVs of the type *chevron* (control:  $8.7 \pm 1.6\%$ ;  $n =$   
160  $24$ ; *Mage12*<sup>m+/p-</sup>:  $4.0 \pm 0.9\%$ ;  $n = 28$ ;  $P = 0.008$ ), 71% less USVs of the type *step-down* (control:  
161  $0.7 \pm 0.1\%$ ;  $n = 24$ ; *Mage12*<sup>m+/p-</sup>:  $0.2 \pm 0.05\%$ ;  $n = 28$ ;  $P < 10^{-4}$ ), 44% less USVs of the type  
162 *step-up* (control:  $14.5 \pm 1.4\%$ ;  $n = 24$ ; *Mage12*<sup>m+/p-</sup>:  $8.1 \pm 1.3\%$ ;  $n = 28$ ;  $P = 0.001$ ), and 87%  
163 less USVs of the type *two-steps* (control:  $3.6 \pm 1.1\%$ ;  $n = 24$ ; *Mage12*<sup>m+/p-</sup>:  $0.5 \pm 0.2\%$ ;  $n = 28$ ;  $P$   
164  $= 0.005$ ) compared to controls (**Figure 3D**). Conversely, *Mage12*<sup>m+/p-</sup> pups emit 36% more USVs  
165 of the type *flat* (control:  $9.7 \pm 0.9\%$ ;  $n = 24$ ; *Mage12*<sup>m+/p-</sup>:  $15.2 \pm 1.2\%$ ;  $n = 28$ ;  $P = 0.007$ ) and  
166 33% more USVs of the type *short* compared to controls (control:  $23.8 \pm 1.8\%$ ;  $n = 24$ ;  
167 *Mage12*<sup>m+/p-</sup>:  $35.5 \pm 2.0\%$ ;  $n = 28$ ;  $P < 10^{-4}$ ; **Figure 3D**). (**Supplementary Table 2** provides a  
168 detailed analysis of the spectro-temporal features of each syllable type across all ages tested in  
169 controls and *Mage12*<sup>m+/p-</sup> pups.) In summary, we found that *Mage12*<sup>m+/p-</sup> mice at P8 use simpler  
170 vocalizations that fall under the ‘flat’ and ‘short’ classifications. These findings are in line with  
171 our previous results (**Figure 1-2**) demonstrating that the largest differences in vocal behavior  
172 occur in eight-day-old *Mage12*<sup>m+/p-</sup> pups.

173

#### 174 **Altered vocal repertoire of *Mage12*<sup>m+/p-</sup> mice**

175 As stated above, the vocal analysis pipeline outputs the probability for each USV to be classified  
176 as each of the eleven syllable types ( $P_1, P_2, P_3, \dots, P_{11}$ ; **Figure 3A-B**). This distribution of  
177 probabilities allows the qualitative and quantitative comparison of the vocal classification among  
178 groups<sup>33</sup>. By considering the distribution of probabilities to classify each USV, it is possible to  
179 estimate how similar the vocal repertoire of one group of mice is to another group. To compare  
180 the vocal repertoire of mice across all ages studied, we used diffusion maps—a dimensionality  
181 reduction technique that decreases the number of dimensions of the probability distribution from  
182 eleven classes to three dimensions in a Euclidean space (**Figure 4A**)<sup>33</sup>. Using pairwise  
183 comparisons (**Figure 4B**), we estimated the similarity between the vocal repertoire of mice of



184 different ages and genotypes. Using this method, we found that control pups at P6 and P8  
185 (Cohen's coefficient:  $\kappa = 0.99$ ) and control pups at P10 and P12 (Cohen's coefficient:  $\kappa = 0.95$ )  
186 display vocal repertoires that are similar to each other (**Figure 4**). These two age groups (P6-P8  
187 and P10-P12), however, present lower pairwise similarities when compared to each other with  $\kappa$   
188 ranging from 0.67 to 0.77 (**Figure 4**). These results suggest that the vocal repertoire of control  
189 pups undergoes significant changes between P8 and P10.

190

191 Next, we analyzed the same transitions in the vocal repertoire of *MageI2<sup>m+/p-</sup>* pups. The  
192 comparison between the vocal repertoire of *MageI2<sup>m+/p-</sup>* pups at P6 and P8 show lower pairwise  
193 similarity ( $\kappa = 0.80$ ) compared to control pups (**Figure 4**). In contrast to littermate controls,  
194 *MageI2<sup>m+/p-</sup>* pups at P8 show a higher pairwise similarity with P10 ( $\kappa = 0.84$ ) and P12 ( $\kappa = 0.99$ )  
195 pups. These findings suggest that *MageI2<sup>m+/p-</sup>* pups switch their vocal repertoire at a younger  
196 age (P8) to a vocal repertoire that control pups emit at an older age (P10-P12).

197

198 Finally, we directly compared the vocal repertoire of *MageI2<sup>m+/p-</sup>* and control pups. *MageI2<sup>m+/p-</sup>*  
199 pups, at P6, show high pairwise similarity when compared to controls at P6 ( $\kappa = 1.00$ ) and P8 ( $\kappa$   
200 = 1.00), but not at P10 ( $\kappa = 0.80$ ) and P12 ( $\kappa = 0.72$ ). At P8, *MageI2<sup>m+/p-</sup>* pups show relatively  
201 low pairwise similarities with control pups at P6 ( $\kappa = 0.76$ ) and P8 ( $\kappa = 0.78$ ) but show high  
202 similarities with control pups at P10 ( $\kappa = 1.00$ ) and P12 ( $\kappa = 0.95$ ). At P10, *MageI2<sup>m+/p-</sup>* pups  
203 show relatively lower pairwise similarities with control pups at P6 ( $\kappa = 0.67$ ) and P8 ( $\kappa = 0.70$ )  
204 than at P10 ( $\kappa = 0.82$ ) and P12 ( $\kappa = 0.81$ ). This pattern is more evident in P12 *MageI2<sup>m+/p-</sup>* pups,  
205 which show lower pairwise similarities with control pups at P6 ( $\kappa = 0.74$ ) and P8 ( $\kappa = 0.75$ ) than  
206 at P10 ( $\kappa = 0.99$ ) and P12 ( $\kappa = 0.97$ ). Altogether, these analyses suggest that the vocal  
207 repertoire of *MageI2<sup>m+/p-</sup>* pups transforms at a faster pace than control pups—with *MageI2<sup>m+/p-</sup>*  
208 pups at P8 resembling control pups at P10-P12. Thus, the critical phase of development

209 between P8 and P10 seems to mark an important period for the effect of the maternally  
210 imprinted gene, *Mage12*, on the vocal behavior of the offspring.

211 **Discussion**

212

213 In this study, we recorded and analyzed vocalizations from *Mage12* deficient pups and their  
214 wildtype littermates during a 20-minute period at postnatal days 6, 8, 10 and 12. Using custom-  
215 built software to automatically analyze vocalizations<sup>33</sup>, we counted the number of vocalizations  
216 and measured the spectro-temporal features of each vocalization, including its intensity,  
217 duration, bandwidth, mean frequency, maximum frequency, minimum frequency, and use of  
218 harmonic components. We also assigned a syllable type for each vocalization based on its  
219 morphological features in the time-frequency plane. We further used quantitative methods to  
220 analyze the vocal repertoire of mice across groups and ages. These methods shed light on  
221 discrete changes in the development of separation-induced vocalizations in *Mage12* deficient  
222 mice.

223

224 Using our software allowed us to expand the period of analysis to 20 minutes. By comparison,  
225 previous studies quantified vocal behavior during a much shorter period—typically between 1 to  
226 5 minutes. The longer period of analysis enabled us to characterize more than a hundred  
227 thousand vocalizations, which provided an in-depth view of the vocal repertoire of pups. With  
228 regards to the vocal behavior of wildtype mice, our results demonstrated that the emission of  
229 separation-induced USVs gradually decreases from P6-P8 to P10-P12. This result agrees with  
230 previous studies, which show an inverse-U shape profile for separation-induced vocalizations in  
231 mice during the first two weeks of life<sup>15,29,31,32,38</sup>. Based on the large number of vocalizations we  
232 analyzed, we also found that wildtype mice use simpler vocalizations at older ages (P10-P12)  
233 compared to younger ages (P6-P8). These findings in wildtype mice provide the basis for  
234 comparisons with *Mage12* deficient pups.

235

236 Intriguingly, *Mage12* deficient pups show different dynamics for separation-induced  
237 vocalizations. At P6, these pups vocalize comparably to wildtype littermates, but at P8, their  
238 vocal number and features resemble wildtype littermates that are older (P10-P12). An  
239 explanation for these results is that *Mage12* deficient pups are less responsive to certain social  
240 cues. In socially isolated pups, therefore, the deprivation of these cues would not induce the  
241 behavior to the same degree as in wildtype pups. An alternative explanation for these results is  
242 that for *Mage12* deficient pups' vocal behavior does not have the same fitness value compared  
243 to wildtype pups. In the latter case, the behavior begins to change at younger ages due to the  
244 lack of reinforcement. While it is difficult to test these interpretations experimentally, the fact that  
245 *Mage12* deficient pups have lower body weight during early development suggests a decrease in  
246 the fitness of these animals and would support the idea that the development of vocal behavior  
247 in these mice is impaired. Whether the change in vocal behavior and the decrease in body  
248 weight are causally related warrants further investigation.

249  
250 The discrepancies in expression of vocal behavior between wildtype and *Mage12* deficient pups  
251 support a more general role for imprinted genes on offspring behavior. Consider, for example,  
252 previous studies of other imprinted genes. Deletion of the paternally inherited imprinted gene  
253 *Peg3* lowers vocal rate in mouse pups<sup>39</sup>. Conversely, deletion of the maternally inherited gene  
254 *Gabrb3* increases vocal rate<sup>40</sup>. Thus, imprinted genes inherited from the father seem to  
255 increase vocal rate while imprinted genes inherited from the mother seem to decrease vocal  
256 rate. In evolutionary terms, these findings support the theory that genomic imprinting evolved to  
257 balance the cost of the phenotype for the offspring and for the mother, as well as to balance the  
258 best interests of mothers and fathers in altering offspring's phenotype. In the case of paternally  
259 inherited genes, therefore, the expression of these genes favors the use of maternal resources,  
260 which is in the best interests of the father, by increasing vocal behavior to increase maternal  
261 care. Conversely, the loss of these paternally inherited genes favors the conservation of

262 maternal resources, which is in the best interests of the mother, by decreasing vocal behavior  
263 and, consequently, the demand for maternal care<sup>1,41</sup>. Again, the lower body weight of *Mage12*  
264 pups supports this argument<sup>10</sup>. Future studies should test this theoretical view more directly by  
265 systematically investigating the effect of imprinted genes on the behavior of offspring and on the  
266 behavior of mothers towards their offspring.

267 **Acknowledgements**

268 We thank Yuexuan Li, Delva Leão, Dr. Onur Iyilikci, and Dr. Mahdiah Godazgar for critical  
269 feedback on the project and the manuscript. Special thanks to: Delva Leão for her contribution  
270 to our analysis; Jeremy Bober for helping with animal maintenance and care; as well as Antonio  
271 Fonseca who built the VocalMat software used for our analysis of ultrasonic vocal recordings.  
272 We thank David Gillich, Susan Andranovich, Valeria Krizsan, and Vickie Clark for administrative  
273 support. M.O.D. was supported by a NARSAD Young Investigator Grant ID 22709 from the  
274 Brain & Behavior Research Foundation, by the National Institute of Diabetes and Digestive and  
275 Kidney Diseases of the National Institutes of Health (R01DK107916, P30 DK045735), by the  
276 Yale Center for Clinical Investigation Scholar Award, by the Whitehall Foundation, by the  
277 Charles H. Hood Foundation, Inc. (Boston, MA), by a pilot grant from the Modern Diet and  
278 Physiology Research Center (The John B. Pierce Laboratory), by a grant of the Foundation for  
279 Prader-Willi Research, and by the Reginald and Michiko Spector Award in Neuroscience.  
280 G.M.B.O. was supported by the HHMI Gilliam Fellowship. G.M.S. was supported by  
281 Coordenação de Aperfeiçoamento de Pessoal de Nível Superior - Brasil (CAPES). We thank  
282 David Bruin for copyediting the manuscript. The authors declare no conflict of interest.

283

284 **Author contributions**

285 M.O.D and G.M.B.O. conceived the hypothesis, designed the study and wrote the manuscript.  
286 G.M.B.O. performed experiments. G.M.B.O. and G.M.S. analyzed and plotted the data. All  
287 authors read and edited the manuscript.

288 **Methods**

289

290 **Experimental models and subject details**

291 All preweaning mice used in the experiments were 6 to 12 days old from both sexes (see table  
292 below for total number of recording used under each age specifying sex and genotype). Litters  
293 were provided from 4 separate breeding pairs. Dams used were 2 to 6 months old. To generate  
294 experimental pups, we used the following cross: *Magel2*<sup>m+/p-</sup> (Jax #009062) dams bred with  
295 C57BL/6J (Jax #000664) males. Offspring from this cross were either *Magel2*<sup>m+/p-</sup> or wildtype  
296 (*Magel2*<sup>m+/p+</sup>). All mice were kept in temperature- and humidity-controlled rooms, in a 12/12 hr.  
297 light/dark cycle, with lights on from 7:00 AM–7:00 PM. Studies took place during the light cycle.  
298 Food (Teklad 2018S, Envigo) and water were provided ad libitum. All procedures were  
299 approved by IACUC (Yale University).

| AGE | Control (F) | Control (M) | <i>Magel2</i> <sup>m+/p-</sup> (F) | <i>Magel2</i> <sup>m+/p-</sup> (M) |
|-----|-------------|-------------|------------------------------------|------------------------------------|
| P06 | 9           | 7           | 10                                 | 10                                 |
| P08 | 15          | 9           | 15                                 | 13                                 |
| P10 | 10          | 13          | 11                                 | 10                                 |
| P12 | 15          | 15          | 16                                 | 12                                 |

300

301 **Behavior test**

302 Pups from the same litter were placed individually in a soundproof chamber containing fresh  
303 bedding material<sup>36</sup>. An UltraSoundGate Condenser Microphone CM 16 (Avisoft Bioacoustics,  
304 Berlin, Germany) was placed 10 cm above the recording chamber and connected to the  
305 UltraSoundGate 416 USGH device to record ultrasonic vocalizations. The recording sessions  
306 lasted 20 minutes. Four to eight chambers were recorded simultaneously. After testing, mice  
307 were placed back in their home cage with the dam. Pups were tested at postnatal days 6, 8, 10,  
308 and 12. Because pups that were naïve for the test—only tested at one specific age—show  
309 similar results as pups tested at multiple ages, we pooled all mice together for our analysis.

310

## 311 **Vocalization analysis**

312 Ultrasonic vocalizations were automatically extracted from audio recordings using a custom-built  
313 tool<sup>33</sup>. In brief, audio recordings were converted from the time-domain to the frequency-domain  
314 using a 1024-point Fast Fourier Transform (FFT) through a 512-width hamming window with  
315 50% overlap. Spectrograms were computed from the FFT and processed as images. Each pixel  
316 in the spectrogram corresponded to the intensity of each time-frequency component. Next, we  
317 applied a series of image-processing techniques (e.g., contrast enhancement, binarization,  
318 median filter, and morphological operations) to obtain segmentation of candidate vocalizations.  
319 A single spectrogram was generated for each candidate vocalization detected. Candidate  
320 vocalizations were classified as noise or real vocalization using a local median noise filter. The  
321 remaining vocalization candidates are further labeled under one of eleven call type  
322 classifications<sup>37</sup> using a Convolutional Neural Network (CNN), or as noise. The CNN was  
323 trained using a curated vocalization dataset, containing over 20,000 noise samples and 40,000  
324 vocalization samples. Finally, the tool produces one spectrogram centralized on each  
325 vocalization for visual inspection, and a table (x/sx format) containing spectro-temporal features  
326 for each USV, such as time, duration, bandwidth, frequency, and intensity (minimum, mean, and  
327 maximum) values.

328

## 329 **Quantification and statistical analysis**

330 Prism 8.0 or above was used to analyze data and plot figures. Shapiro-Wilk normality test was  
331 used to assess normal distribution of the data. Then, data were analyzed using two-way  
332 ANOVA or mixed-effects analysis. Sidak's multiple comparisons test was used to find post hoc  
333 differences among groups and to calculate the 95% confidence intervals to report effect size. To  
334 analyze differences in the use of harmonics, we used the non-parametric Mann-Whitney Test  
335 with Bonferroni correction to find statistically different effects. Statistical data are provided in text  
336 and in the figures. In the text, values are provided as mean  $\pm$  SEM.  $P < 0.05$  was considered



337 statistically significant and, when necessary and as described above, was corrected using  
338 Bonferroni's method.

339 **REFERENCES**

- 340 1. Perez JD, Rubinstein ND, Dulac C. New Perspectives on Genomic Imprinting, an  
341 Essential and Multifaceted Mode of Epigenetic Control in the Developing and Adult Brain.  
342 *Annu Rev Neurosci.* 2016. doi:10.1146/annurev-neuro-061010-113708
- 343 2. Barlow DP, Bartolomei MS. Genomic imprinting in mammals. *Cold Spring Harb Perspect*  
344 *Biol.* 2014. doi:10.1101/cshperspect.a018382
- 345 3. Ferguson-Smith AC. Genomic imprinting: The emergence of an epigenetic paradigm. *Nat*  
346 *Rev Genet.* 2011. doi:10.1038/nrg3032
- 347 4. Morison IM, Ramsay JP, Spencer HG. A census of mammalian imprinting. *Trends Genet.*  
348 2005. doi:10.1016/j.tig.2005.06.008
- 349 5. Cassidy SB, Driscoll DJ. Prader-Willi syndrome. *Eur J Hum Genet.* 2009.  
350 doi:10.1038/ejhg.2008.165
- 351 6. Bittel DC, Butler MG. Prader-Willi syndrome: Clinical genetics, cytogenetics and  
352 molecular biology. *Expert Rev Mol Med.* 2005. doi:10.1017/S1462399405009531
- 353 7. Miller JL, Lynn CH, Driscoll DC, et al. Nutritional phases in Prader-Willi syndrome. *Am J*  
354 *Med Genet Part A.* 2011;155(5):1040-1049. doi:10.1002/ajmg.a.33951
- 355 8. Koenig K, Klin A, Schultz R. Deficits in Social Attribution Ability in Prader-Willi Syndrome.  
356 *J Autism Dev Disord.* 2004;34(5):573-582. doi:10.1007/s10803-004-2551-z
- 357 9. Nicholls RD, Knoll JHM, Butler MG, Karam S, Lalande M. Genetic imprinting suggested  
358 by maternal heterodisomy in non-deletion Prader-Willi syndrome. *Nature.* 1989.  
359 doi:10.1038/342281a0
- 360 10. Bischof JM, Stewart CL, Wevrick R. Inactivation of the mouse Magel2 gene results in  
361 growth abnormalities similar to Prader-Willi syndrome. *Hum Mol Genet.* 2007.  
362 doi:10.1093/hmg/ddm225
- 363 11. Schaaf CP, Gonzalez-Garay ML, Xia F, et al. Truncating mutations of MAGEL2 cause  
364 Prader-Willi phenotypes and autism. *Nat Genet.* 2013;45(11):1405-1408.

- 365 doi:10.1038/ng.2776
- 366 12. Kozlov S V., Bogenpohl JW, Howell MP, et al. The imprinted gene *Magel2* regulates  
367 normal circadian output. *Nat Genet.* 2007. doi:10.1038/ng2114
- 368 13. Michelsson K, Michelsson O. Phonation in the newborn, infant cry. In: *International*  
369 *Journal of Pediatric Otorhinolaryngology.* ; 1999. doi:10.1016/S0165-5876(99)00180-9
- 370 14. Lee S. Expression and imprinting of *MAGEL2* suggest a role in Prader-Willi syndrome  
371 and the homologous murine imprinting phenotype. *Hum Mol Genet.* 2000.  
372 doi:10.1093/hmg/9.12.1813
- 373 15. Branchi I, Santucci D, Alleva E. Ultrasonic vocalisation emitted by infant rodents: A tool  
374 for assessment of neurobehavioural development. In: *Behavioural Brain Research.* ;  
375 2001. doi:10.1016/S0166-4328(01)00277-7
- 376 16. Branchi I, Santucci D, Alleva E. Analysis of ultrasonic vocalizations emitted by infant  
377 rodents. *Curr Protoc Toxicol.* 2006. doi:10.1002/0471140856.tx1312s30
- 378 17. Ehret G. Infant rodent ultrasounds - A gate to the understanding of sound communication.  
379 In: *Behavior Genetics.* ; 2005. doi:10.1007/s10519-004-0853-8
- 380 18. Hahn ME, Lavooy MJ. A review of the methods of studies on infant ultrasound production  
381 and maternal retrieval in small rodents. In: *Behavior Genetics.* ; 2005.  
382 doi:10.1007/s10519-004-0854-7
- 383 19. Noirot E. Ultrasounds and maternal behavior in small rodents. *Dev Psychobiol.* 1972.  
384 doi:10.1002/dev.420050410
- 385 20. Nyby J, Wysocki CJ, Whitney G, Dizinno G. Pheromonal regulation of male mouse  
386 ultrasonic courtship (*Mus musculus*). *Anim Behav.* 1977. doi:10.1016/0003-  
387 3472(77)90009-4
- 388 21. Nyby J, Dizinno G, Whitney G. Sexual dimorphism in ultrasonic vocalizations of mice  
389 (*Mus musculus*): Gonadal hormone regulation. *J Comp Physiol Psychol.* 1977.  
390 doi:10.1037/h0077411

- 391 22. Sales GD, Smith JC. Comparative studies of the ultrasonic calls of infant murid rodents.  
392 *Dev Psychobiol.* 1978. doi:10.1002/dev.420110609
- 393 23. Zippelius H-M, Schleidt WM. Ultraschall-Laute bei jungen Mäusen. *Naturwissenschaften.*  
394 1956;43(21):502-502. doi:10.1007/BF00632534
- 395 24. Carlier M, Roubertoux P, Cohen-Salmon C. Differences in patterns of pup care in *Mus*  
396 *musculus domesticus* I-Comparisons between eleven inbred strains. *Behav Neural Biol.*  
397 1982. doi:10.1016/S0163-1047(82)91213-4
- 398 25. Cohen-Salmon C. Differences in patterns of pup care in *Mus musculus domesticus*. VIII  
399 Effects of previous experience and parity in XLII inbred mice. *Physiol Behav.* 1987.  
400 doi:10.1016/0031-9384(87)90204-6
- 401 26. Noirot E. Changes in responsiveness to young in the adult mouse: The effect of external  
402 stimuli. *J Comp Physiol Psychol.* 1964. doi:10.1037/h0042864
- 403 27. Smith JC. Responses of adult mice to models of infant calls. *J Comp Physiol Psychol.*  
404 1976. doi:10.1037/h0077287
- 405 28. Hofer MA, Brunelli SA, Shair HN. Potentiation of isolation-induced vocalization by brief  
406 exposure of rat pups to maternal cues. *Dev Psychobiol.* 1994;27(8):503-517.  
407 doi:10.1002/dev.420270804
- 408 29. Hernandez-Miranda LR, Ruffault P-L, Bouvier JC, et al. Genetic identification of a  
409 hindbrain nucleus essential for innate vocalization. *Proc Natl Acad Sci U S A.*  
410 2017;114(30):8095-8100. doi:10.1073/pnas.1702893114
- 411 30. Nyby J, Dizinno GA, Whitney G. Social status and ultrasonic vocalizations of male mice.  
412 *Behav Biol.* 1976. doi:10.1016/S0091-6773(76)92198-2
- 413 31. Castellucci GA, Calbick D, McCormick D. The temporal organization of mouse ultrasonic  
414 vocalizations. *PLoS One.* 2019. doi:10.1371/journal.pone.0199929
- 415 32. Elwood RW, Keeling F. Temporal organization of ultrasonic vocalizations in infant mice.  
416 *Dev Psychobiol.* 1982. doi:10.1002/dev.420150306

- 417 33. Fonseca AHO, Santana GM, Bampi S, Dietrich MO. Analysis of ultrasonic vocalizations  
418 from mice using computer vision and machine learning. *bioRxiv*. 2020.  
419 doi:10.1101/2020.05.20.105023
- 420 34. Riede T. Subglottal pressure, tracheal airflow, and intrinsic laryngeal muscle activity  
421 during rat ultrasound vocalization. *J Neurophysiol*. 2011. doi:10.1152/jn.00478.2011
- 422 35. Kamaludin AA, Smolarchuk C, Bischof JM, et al. Muscle dysfunction caused by loss of  
423 Magel2 in a mouse model of Prader-Willi and Schaaf-Yang syndromes. *Hum Mol Genet*.  
424 2016. doi:10.1093/hmg/ddw225
- 425 36. Zimmer MR, Fonseca AHO, Iyilikci O, Pra RD, Dietrich MO. Functional Ontogeny of  
426 Hypothalamic Agrp Neurons in Neonatal Mouse Behaviors. *Cell*. 2019.  
427 doi:10.1016/j.cell.2019.04.026
- 428 37. Grimsley JMS, Monaghan JJM, Wenstrup JJ. Development of social vocalizations in  
429 mice. *PLoS One*. 2011. doi:10.1371/journal.pone.0017460
- 430 38. Winslow JT, Insel TR. *Endogenous Opioids: Do They Modulate the Rat Pup's Response*  
431 *to Social Isolation?* Vol 105.; 1991.
- 432 39. McNamara GI, Creeth HDJ, Harrison DJ, et al. Loss of offspring Peg3 reduces neonatal  
433 ultrasonic vocalizations and increases maternal anxiety in wild-type mothers. *Hum Mol*  
434 *Genet*. 2018. doi:10.1093/hmg/ddx412
- 435 40. Jiang YH, Pan Y, Zhu L, et al. Altered ultrasonic vocalization and impaired learning and  
436 memory in Angelman syndrome mouse model with a large maternal deletion from Ube3a  
437 to Gabrb3. *PLoS One*. 2010. doi:10.1371/journal.pone.0012278
- 438 41. Wilkins JF, Haig D. What good is genomic imprinting: The function of parent-specific  
439 gene expression. *Nat Rev Genet*. 2003. doi:10.1038/nrg1062
- 440
- 441

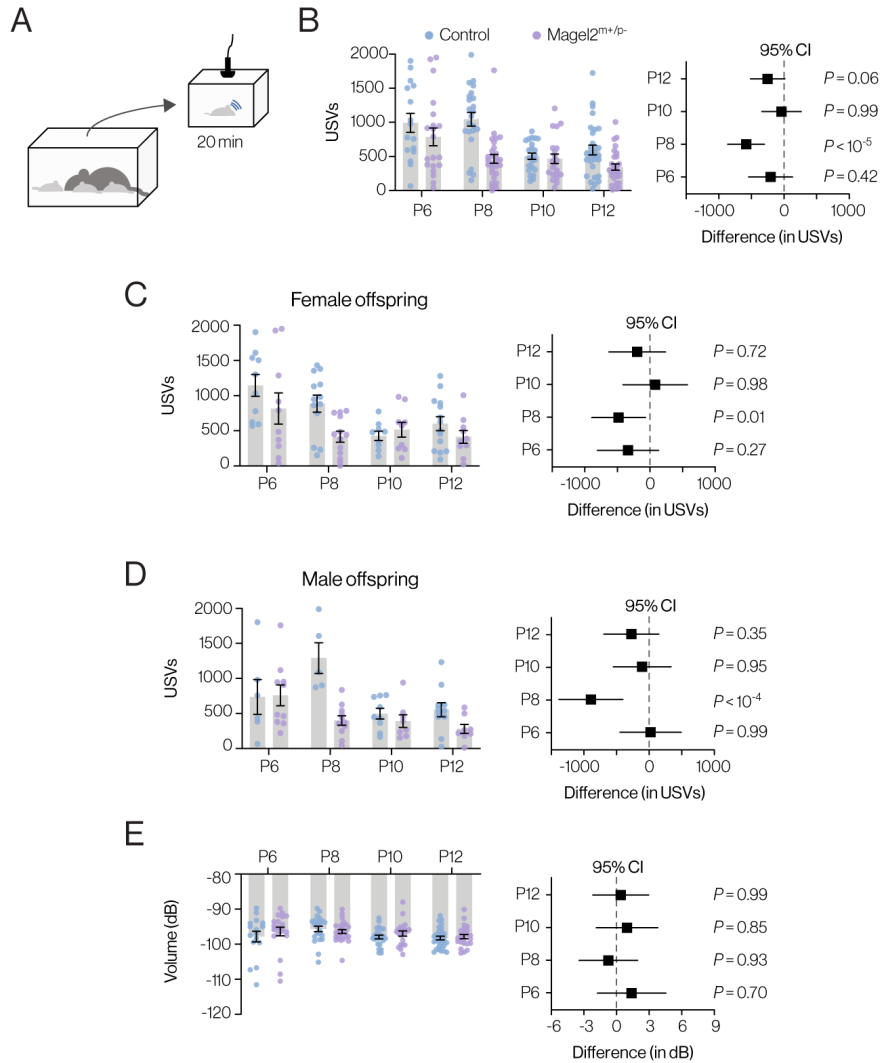

442

443 **Figure 1. *Magel2* deficiency affects the emission of ultrasonic vocalizations in mice. (A)**  
444 **Schematic of the protocol used to record separation-induced USVs in mice (from P6 to P12); pups**  
445 **are separated from the home nest in a new chamber equipped with an ultrasonic microphone and**  
446 **recorded for 20 minutes. (B) Total number of USVs emitted by control (blue) and *Magel2* deficient**  
447 **(purple) littermates at P6, P8, P10, and P12; right panel denotes the 95% confidence intervals as**  
448 **a measure of effect size. (C) Similar to (B), but only considering female pups. (D) Similar to (B),**  
449 **but only considering male pups. (E) Average intensity of the USVs measured in decibels; right**  
450 **panel denotes the 95% confidence intervals as a measure of effect size. Bars represent mean**  
451 **value with error bars representing SEM and round symbols representing individual values. When**  
452 **plotting the effect sizes, squared symbols and black lines represent 95% confidence intervals**  
453 **calculated as the different between *Magel2* deficient and control pups. *P* values are provided in**  
454 **the figures as calculated using Sidak's multiple comparison test. The sample sizes for control and**  
455 ***Magel2* deficient pups are: P6, n = 16 and 20; P8, n = 24 and 28; P10, n = 23 and 20; and P12,**  
456 **n = 30 and 28, respectively.**

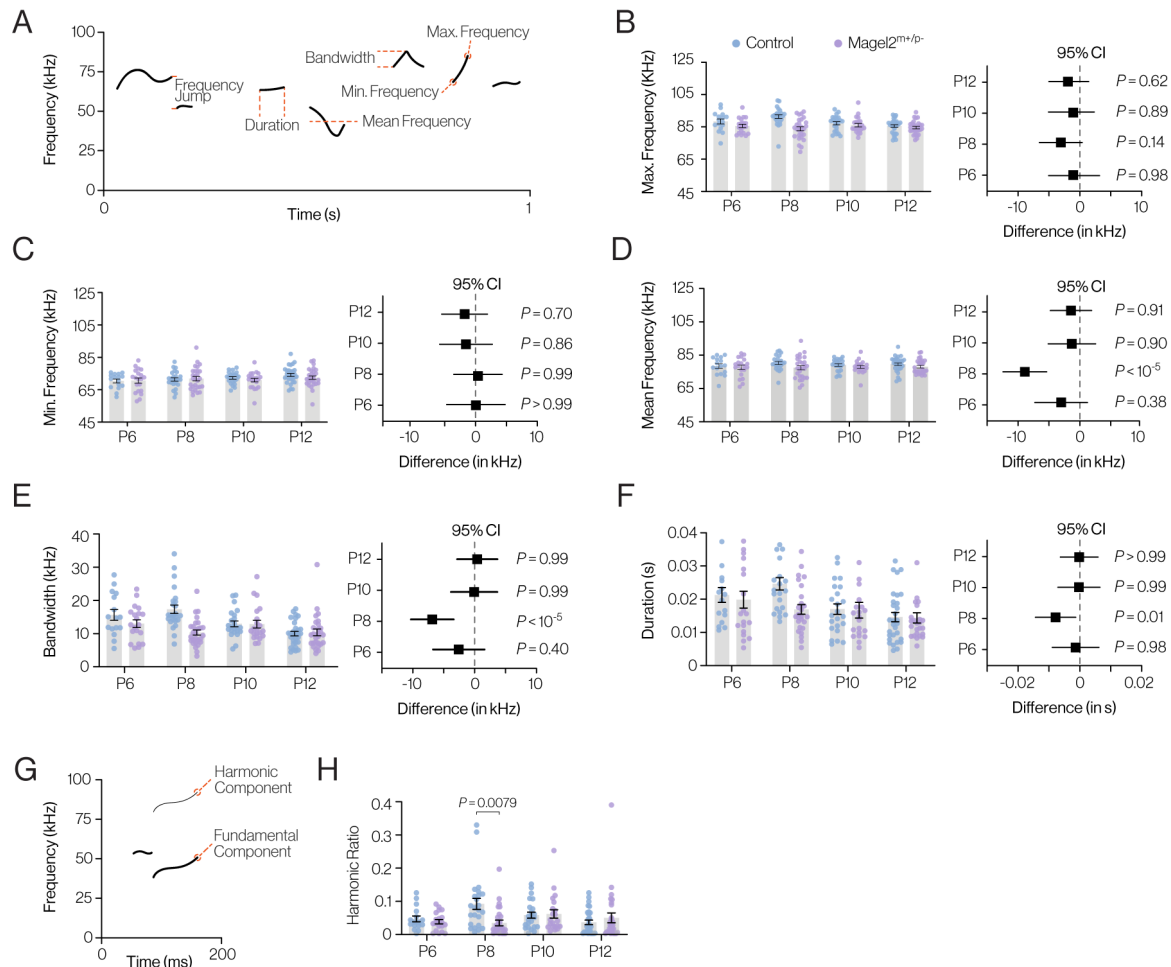

457

458 **Figure 2. *Mage12* deficient pups emit ultrasonic vocalizations of distinct spectro-temporal**  
 459 **features.** (A) Illustration of a spectrogram with the spectro-temporal features measured for each  
 460 USV. (B) Maximum frequency of the USVs emitted by control and *Mage12* deficient littermates  
 461 at P6, P8, P10, and P12; right panel denotes the 95% confidence intervals as a measure of  
 462 effect size. (C) Similar to (B) but plotting the minimum frequency of the USVs. (D) Similar to (B)  
 463 but plotting the mean frequency of the USVs. (E) Similar to (B) but plotting the bandwidth of the  
 464 USVs. (F) Similar to (B) but plotting the duration of the USVs. (G) Illustration of the spectrogram  
 465 of a single USV with a harmonic component. (H) Ratio of harmonic across all USVs emitted by  
 466 control and *Mage12* deficient littermates. Bars represent mean value with error bars representing  
 467 SEM and round symbols representing individual values. When plotting the effect sizes, squared  
 468 symbols and black lines represent 95% confidence intervals calculated as the different between  
 469 *Mage12* deficient and control pups. In B-F, P values are provided in the figures as calculated  
 470 using Sidak's multiple comparison test post hoc analysis from two-way ANOVA test. In H, P  
 471 values are provided as calculated using Mann-Whitney test. The sample sizes for control and  
 472 *Mage12* deficient pups are: P6, n = 16 and 20; P8, n = 24 and 28; P10, n = 23 and 20; and P12,  
 473 n = 30 and 28, respectively.

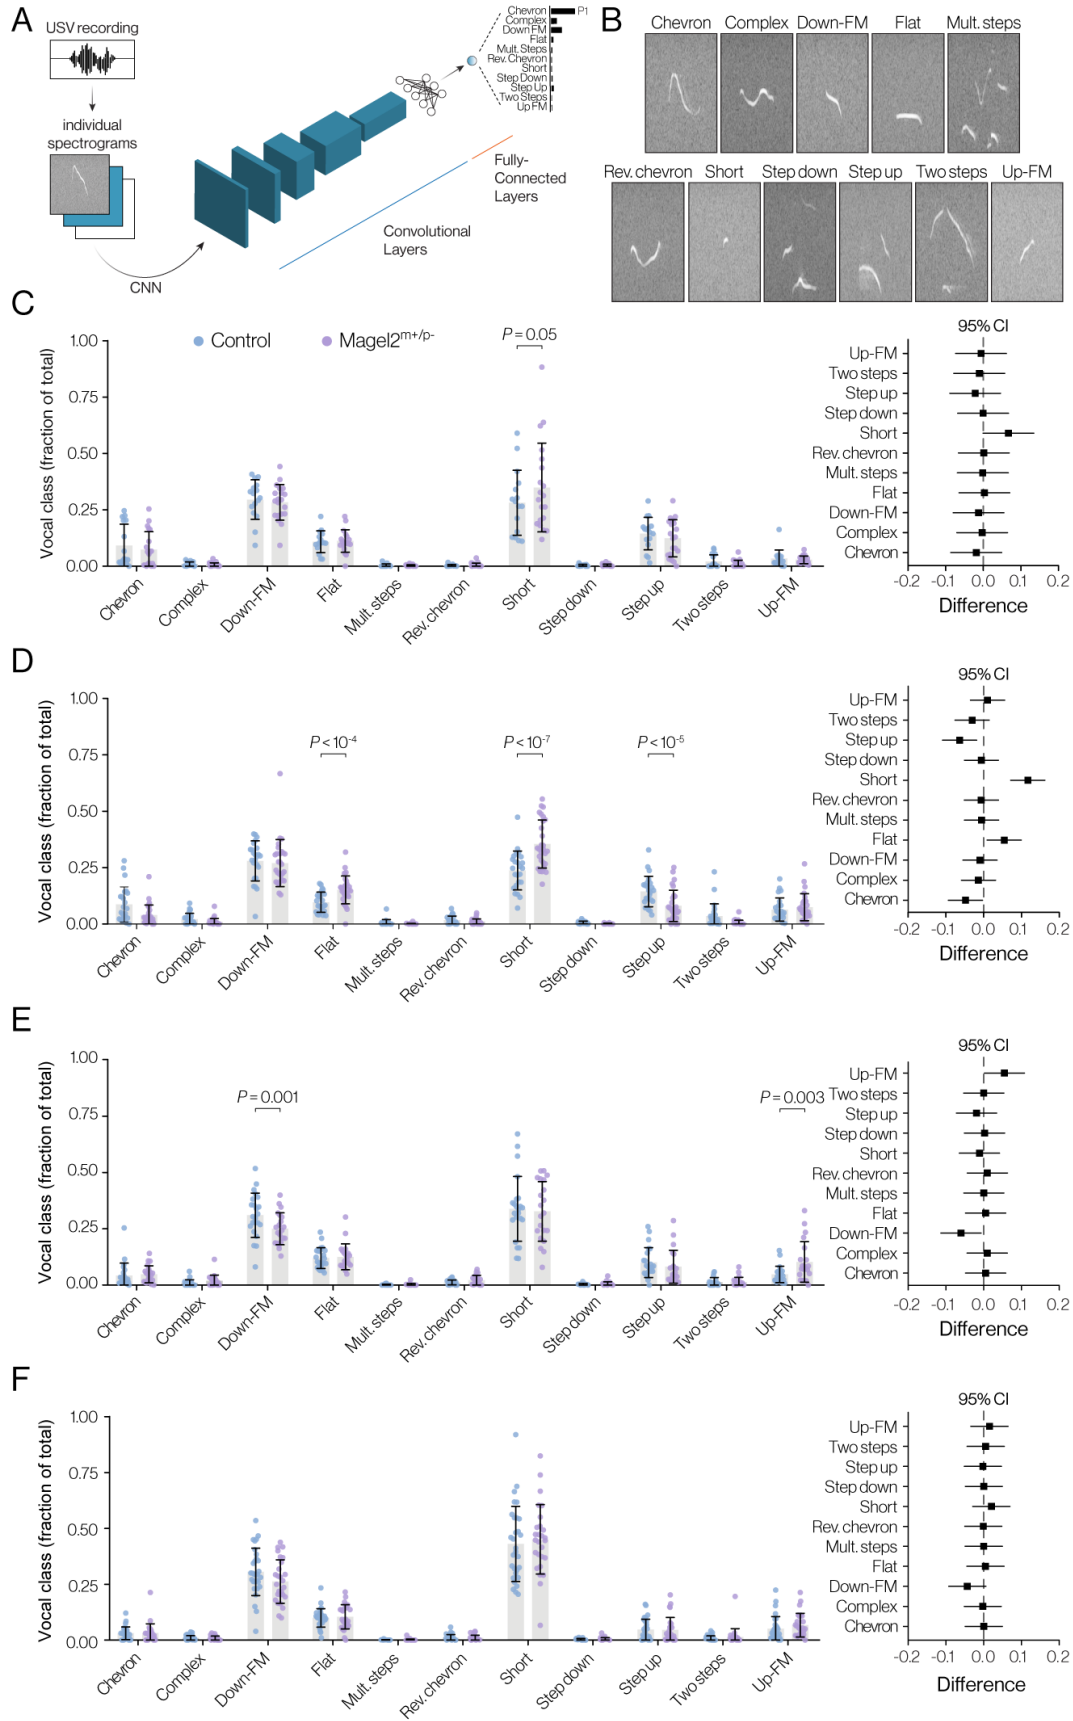



475 **Figure 3. *Mage12* deficient pups emit ultrasonic vocalizations with discrete changes in the**  
476 **distribution of syllable types.** (A) Illustration of the convolutional neural network used to  
477 classify each USV into one of eleven syllable types based on their morphology in spectrograms.  
478 (B) Spectrograms representing each of the eleven syllable types. (C) Distribution of syllable  
479 types in P6 pups—control in blue and *Mage12* deficient in purple. Data are showed as fraction of  
480 the total number of USVs; right panel denotes the 95% confidence intervals as a measure of  
481 effect size. (D) Similar to (C), but for P8 pups. (E) Similar to (C), but for P10 pups. (F) Similar to  
482 (C), but for P12 pups. Bars represent mean value with error bars representing SEM and round  
483 symbols representing individual values. When plotting the effect sizes, squared symbols and  
484 black lines represent 95% confidence intervals calculated as the different between *Mage12*  
485 deficient and control pups. *P* values are provided in the figures as calculated using Sidak's  
486 multiple comparison test as a post hoc analysis after two-way ANOVA. The sample sizes for  
487 control and *Mage12* deficient pups are: P6, n = 16 and 20; P8, n = 24 and 28; P10, n = 23 and  
488 20; and P12, n = 30 and 28, respectively.

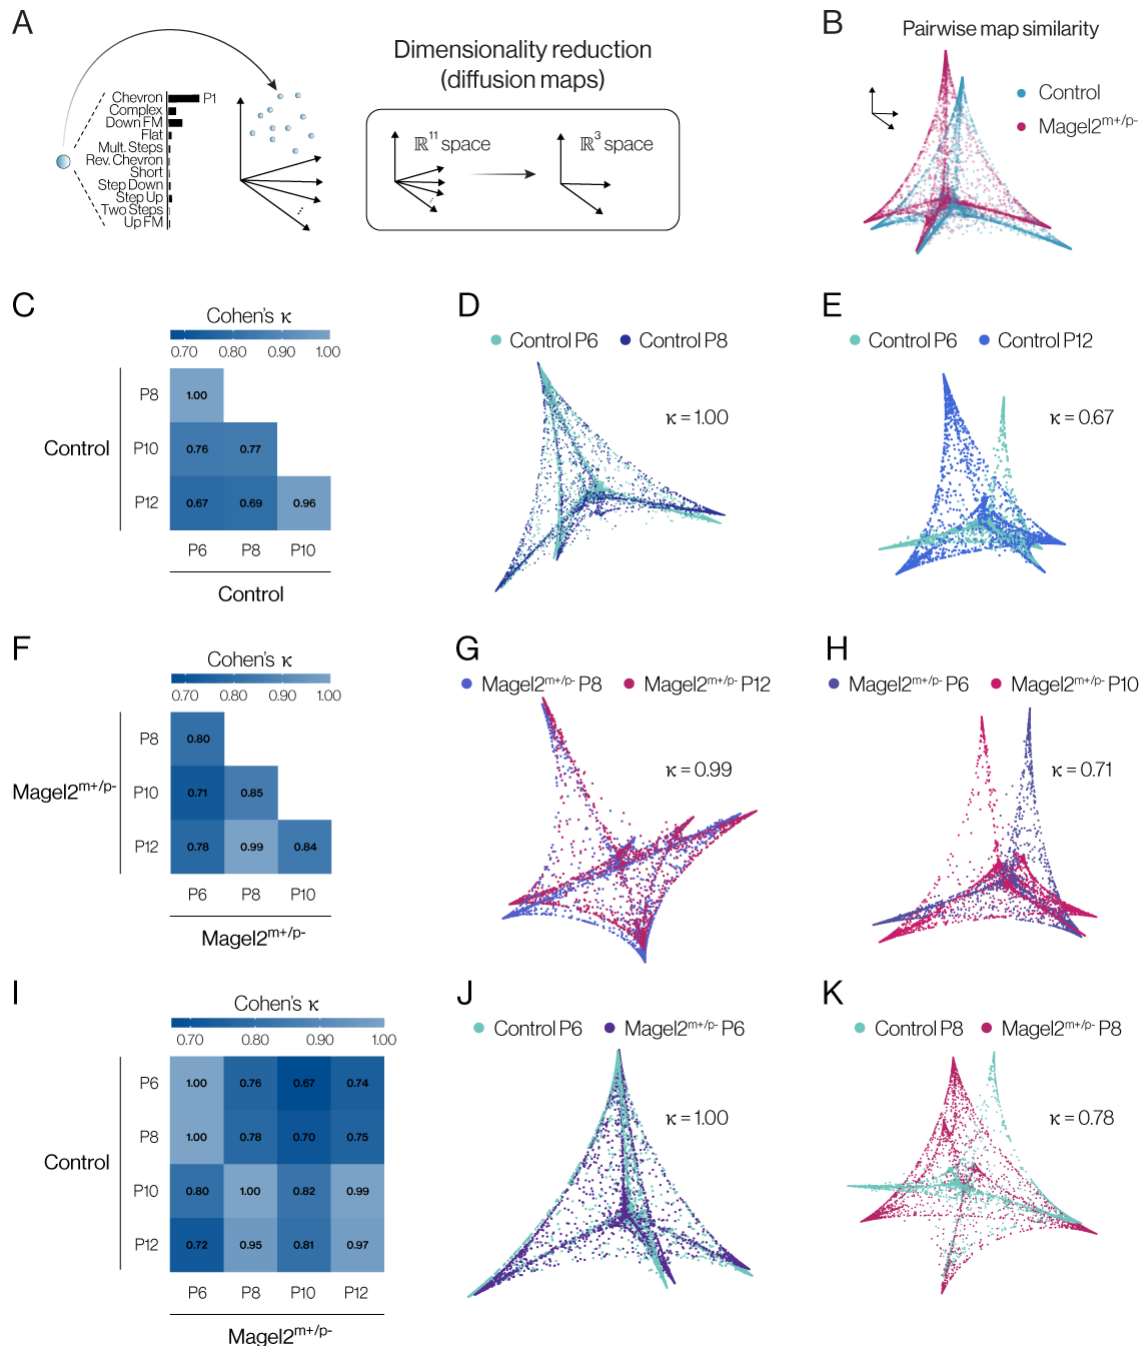

489  
490  
491  
492  
493  
494  
495  
496  
497  
498  
499

**Figure 4. Analysis of the vocal repertoire of pups across ages.** (A) Illustration of the output of the convolutional neural network, with a distribution of eleven probabilities for vocal classification (one probability for each of the eleven syllable types, with the highest probability defining the syllable type). Using diffusion maps, a dimensionality reduction technique, these eleven dimensions are reduced to three dimensions in the Euclidian space. (B) Illustration of a pairwise comparison of the vocal repertoire of pups using diffusion maps and 3D alignment of the manifolds (see methods for more details). (D) Comparison of the pairwise distance matrix between control pups at different ages using Cohen's Kappa coefficient. (D-E) Examples of two pairwise comparisons with high and low alignment. (F-H) Similar to (D-E), but for *Magel2* deficient pups. (I-K) Similar to (C-H), but comparing control and *Magel2* deficient pups across

500 ages. The sample sizes for control and *Mage/2* deficient pups are: P6, n = 16 and 20; P8, n = 24  
501 and 28; P10, n = 23 and 20; and P12, n = 30 and 28, respectively.
